# Supplementary material
Source: ML conference proceedings conference paper supplement (https://openreview.net/forum?id=3InxcRQsYLf)
Supplement: supplementary_material [file attachment]

## A ARCHITECTURE DETAILS AND HYPERPARAMETERS

### A.1 VQ-VAE ENCODER AND DECODER

Table 1: Hyperparameters of VQ-VAE encoder and decoder models for Moving MNIST, ViZDoom (HGS = Health Gathering Supreme), and BAIR

|                                       | Moving MNIST             | ViZDoom (HGS)            | BAIR / ViZDoom (Battle2) |
|---------------------------------------|--------------------------|--------------------------|--------------------------|
| Input size                            | $16 \times 64 \times 64$ | $16 \times 64 \times 64$ | $16 \times 64 \times 64$ |
| Latent size                           | $4 \times 16 \times 16$  | $4 \times 16 \times 16$  | $8 \times 16 \times 16$  |
| $\beta$ (commitment loss coefficient) | 0.25                     | 0.25                     | 0.25                     |
| Batch size                            | 64                       | 64                       | 64                       |
| Learning rate                         | $7 \times 10^{-4}$       | $7 \times 10^{-4}$       | $7 \times 10^{-4}$       |
| Hidden units                          | 240                      | 240                      | 240                      |
| Residual units                        | 128                      | 128                      | 128                      |
| Residual layers                       | 2                        | 4                        | 4                        |
| Uses attention                        | No                       | Yes                      | Yes                      |
| Codebook size                         | 512                      | 2048                     | 2048                     |
| Codebook dimension                    | 64                       | 256                      | 256                      |
| Encoder filter size                   | 3                        | 3                        | 3                        |
| Upsampling conv filter size           | 4                        | 4                        | 4                        |
| Training steps                        | 20k                      | 75K                      | 75k                      |

### A.2 PRIOR NETWORKS

Table 2: Hyperparameters of prior networks for Moving MNIST, ViZDoom (HGS), BAIR and ViZDoom (Battle2).

|                    | Moving MNIST            | ViZDoom (HGS)           | BAIR                        | ViZDoom (Battle2)       |
|--------------------|-------------------------|-------------------------|-----------------------------|-------------------------|
| Input size         | $4 \times 16 \times 16$ | $4 \times 16 \times 16$ | $8 \times 16 \times 16$     | $8 \times 16 \times 16$ |
| Conditional sizes  | $1 \times 64 \times 64$ | 60                      | $3 \times 64 \times 64, 64$ | 315                     |
| Batch size         | 32                      | 32                      | 32                          | 32                      |
| Learning rate      | $3 \times 10^{-4}$      | $3 \times 10^{-4}$      | $3 \times 10^{-4}$          | $3 \times 10^{-4}$      |
| Vocabulary size    | 512                     | 2048                    | 2048                        | 2048                    |
| Attention heads    | 4                       | 4                       | 4                           | 4                       |
| Attention layers   | 8                       | 22                      | 22                          | 22                      |
| Resnet depth       | 18                      | None                    | 34                          | None                    |
| Resnet units       | 512                     | None                    | 512                         | None                    |
| Dropout            | 0.1                     | 0.1                     | 0.1                         | 0.1                     |
| Training steps 40k | 80k                     | 80k                     | 80k                         | 80k                     |
